# Supplementary material for: Critical evaluation of an autologous peripheral blood mononuclear cell-based humanized cancer model
Source: PubMed Central journal article supplement (PMC9467357; doi:10.1371/journal.pone.0273076), 2022-09-12

**S1 Fig. Development of a humanized mouse model (iPDX).** Schematic showing the workflow and the time frame of humanized Pancreatic and Colorectal cancer iPDX mouse model establishment and analysis of T cell engraftment.

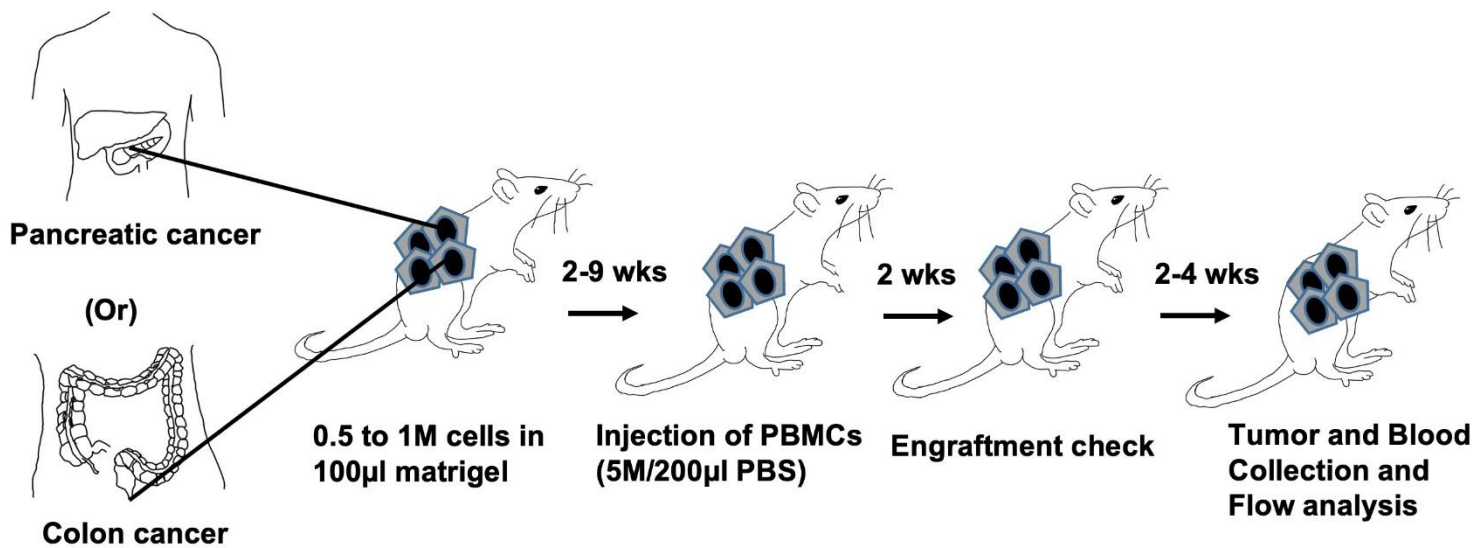

Supplement: pone.0273076.s001.pdf [file pone.0273076.s001.pdf]
