# Supplementary material for: Critical evaluation of an autologous peripheral blood mononuclear cell-based humanized cancer model
Source: PubMed Central journal article supplement (PMC9467357; doi:10.1371/journal.pone.0273076), 2022-09-12

**S2 Fig. PBMC demonstrate limited signs of GVHD for up to 8 weeks in immuno-compromised mice.** NSG mice (6-8-week-old) were injected with 5 million hPBMCs (i.v) and GVHD was documented over a period of 12 weeks. **(A)** GVHD scores (n=9). **(B)** Average weight change and GVHD scores (n=9). **(C)** Weight change in individual mice (n=9).

**A**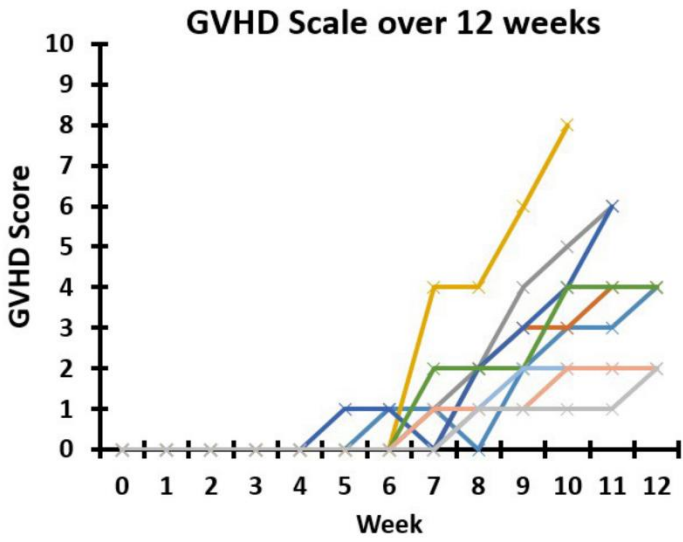**B**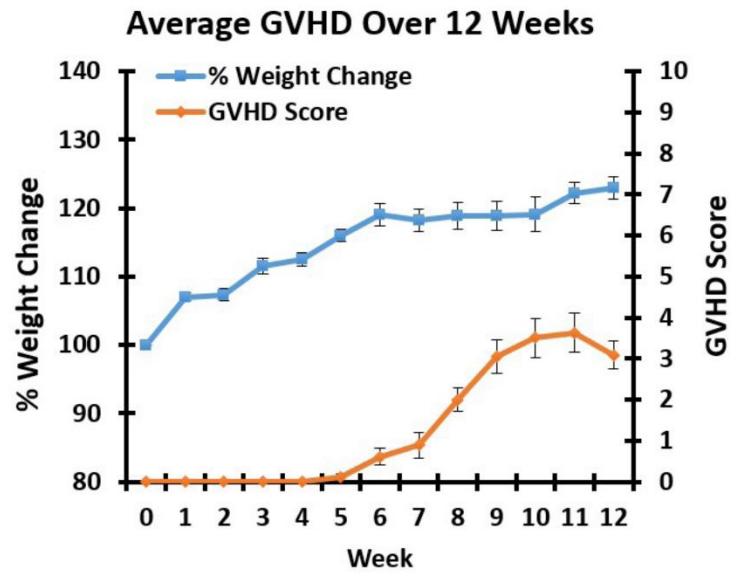**C**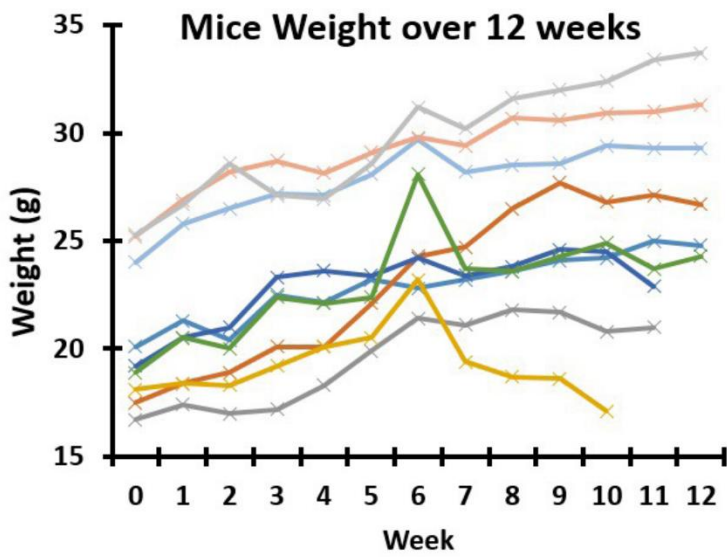

Supplement: pone.0273076.s002.pdf [file pone.0273076.s002.pdf]
