# Supplementary material for: Critical evaluation of an autologous peripheral blood mononuclear cell-based humanized cancer model
Source: PubMed Central journal article supplement (PMC9467357; doi:10.1371/journal.pone.0273076), 2022-09-12

**S4 Fig. Identification and phenotypic characterization of pancreatic iPDX tumor derived human CD3<sup>+</sup> T cells.** (A) Representative flow cytometry dot plots showing CD3<sup>+</sup>CD45<sup>+</sup> tumor infiltrating lymphocytes (TILs) (top left); (B) Bar graph of average values (top right). Data from samples collected at 7 weeks. (C) CD4<sup>+</sup> and CD8<sup>+</sup> TILs from 2 individual MPC iPDX mouse tumors (bottom panel). (D) PD-1<sup>+</sup>CD4<sup>+</sup> TILs (left) and PD-1<sup>+</sup>CD8<sup>+</sup> TILs (middle) from a representative MPC iPDX mouse tumor. T lymphocytes from non-cancer human donor PB obtained from phlebotomy lab (grey histogram, left) and TILs from iPDX tumor (empty histogram, right). (E) Bar graph showing average percentage of PD-1<sup>+</sup>CD4<sup>+</sup> and CD8<sup>+</sup> T lymphocytes from 2 individual MPC iPDX mouse tumors. Data from samples collected at 7 weeks. Values represent mean of two animals per group  $\pm$  SD. \*\*p < 0.005.

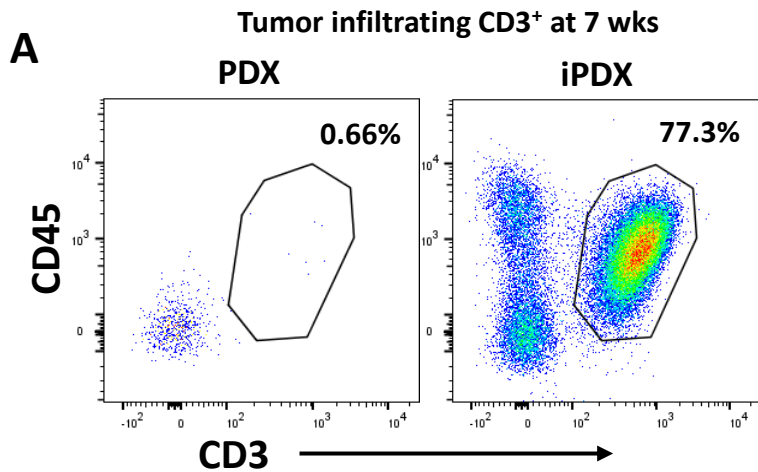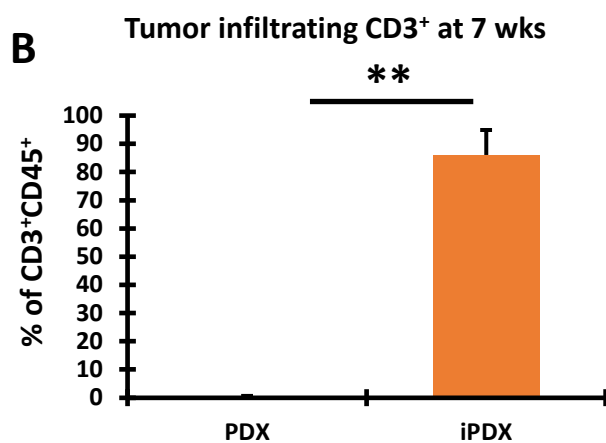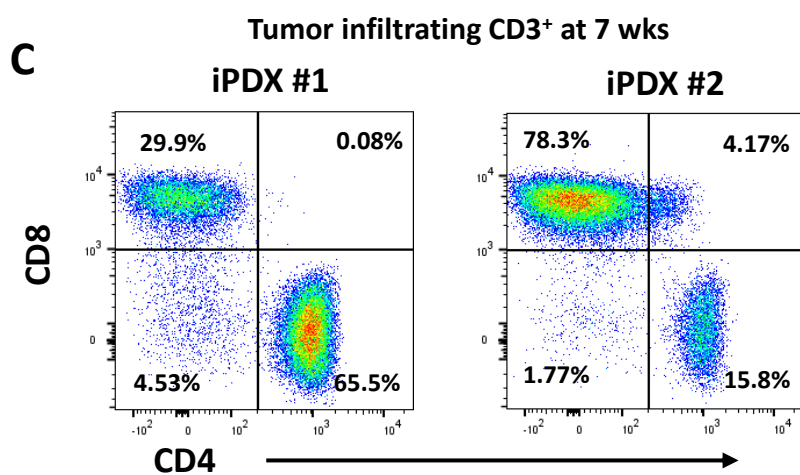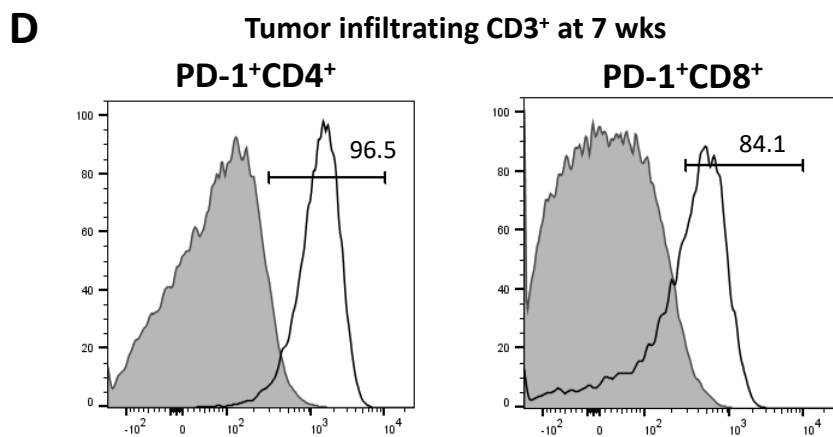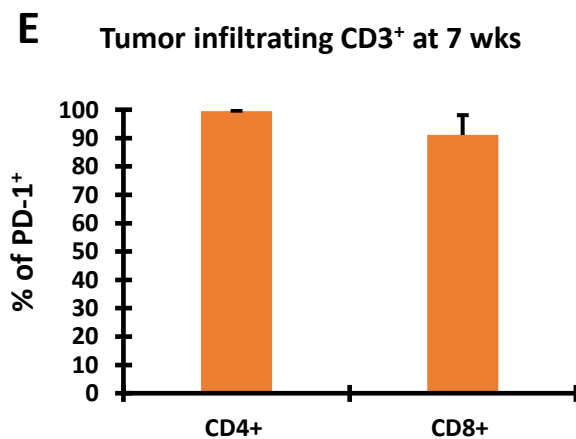

Supplement: pone.0273076.s004.pdf [file pone.0273076.s004.pdf]
